# Supplementary material for: Scavenging dicarbonyls with 5′-O-pentyl-pyridoxamine increases HDL net cholesterol efflux capacity and attenuates atherosclerosis and insulin resistance
Source: PubMed Central journal article supplement — Mol Metab. 2022 Dec 5;67:101651. doi: 10.1016/j.molmet.2022.101651 (PMC9792904; doi:10.1016/j.molmet.2022.101651), 2022-12-05
Supplement: mmc1.pdf [file mmc1.pdf]

**Scavenging dicarbonyls with 5'-O-pentyl-pyridoxamine increases HDL net cholesterol efflux capacity and attenuates atherosclerosis and insulin resistance**

Jiansheng Huang<sup>1,5</sup>, Huan Tao<sup>1,5</sup>, Patricia G. Yancey<sup>1</sup>, Zoe Leuthner<sup>1</sup>, Linda S. May-Zhang<sup>2</sup>, Ju-Yang Jung<sup>1</sup>, Youmin Zhang<sup>1</sup>, Lei Ding<sup>1</sup>, Venkataraman Amarnath<sup>3</sup>, Dianxin Liu<sup>1</sup>, Sheila Collins<sup>1,4</sup>, Sean S. Davies<sup>2</sup>, MacRae F. Linton<sup>1,2</sup>

<sup>1</sup>Department of Medicine, Cardiovascular Medicine, Vanderbilt University Medical Center, Nashville, TN

<sup>2</sup>Department of Pharmacology, Vanderbilt University, Nashville, TN

<sup>3</sup>Department of Pathology, Microbiology & Immunology, Vanderbilt University Medical Center, Nashville, TN

<sup>4</sup>Department of Molecular Physiology and Biophysics, Vanderbilt University, Nashville, TN

<sup>5</sup>These authors contributed equally: Jiansheng Huang, Huan Tao

Address correspondence to:

MacRae F. Linton, MD

2220 Pierce Avenue, Nashville, TN

Department of Cardiovascular Medicine, Atherosclerosis Research Unit

Vanderbilt University Medical Center

Email: [macrae.linton@vumc.org](mailto:macrae.linton@vumc.org)

Short title: 5'-O-pentyl-pyridoxamine improves insulin sensitivity and reduces atherosclerosis

Figure S1

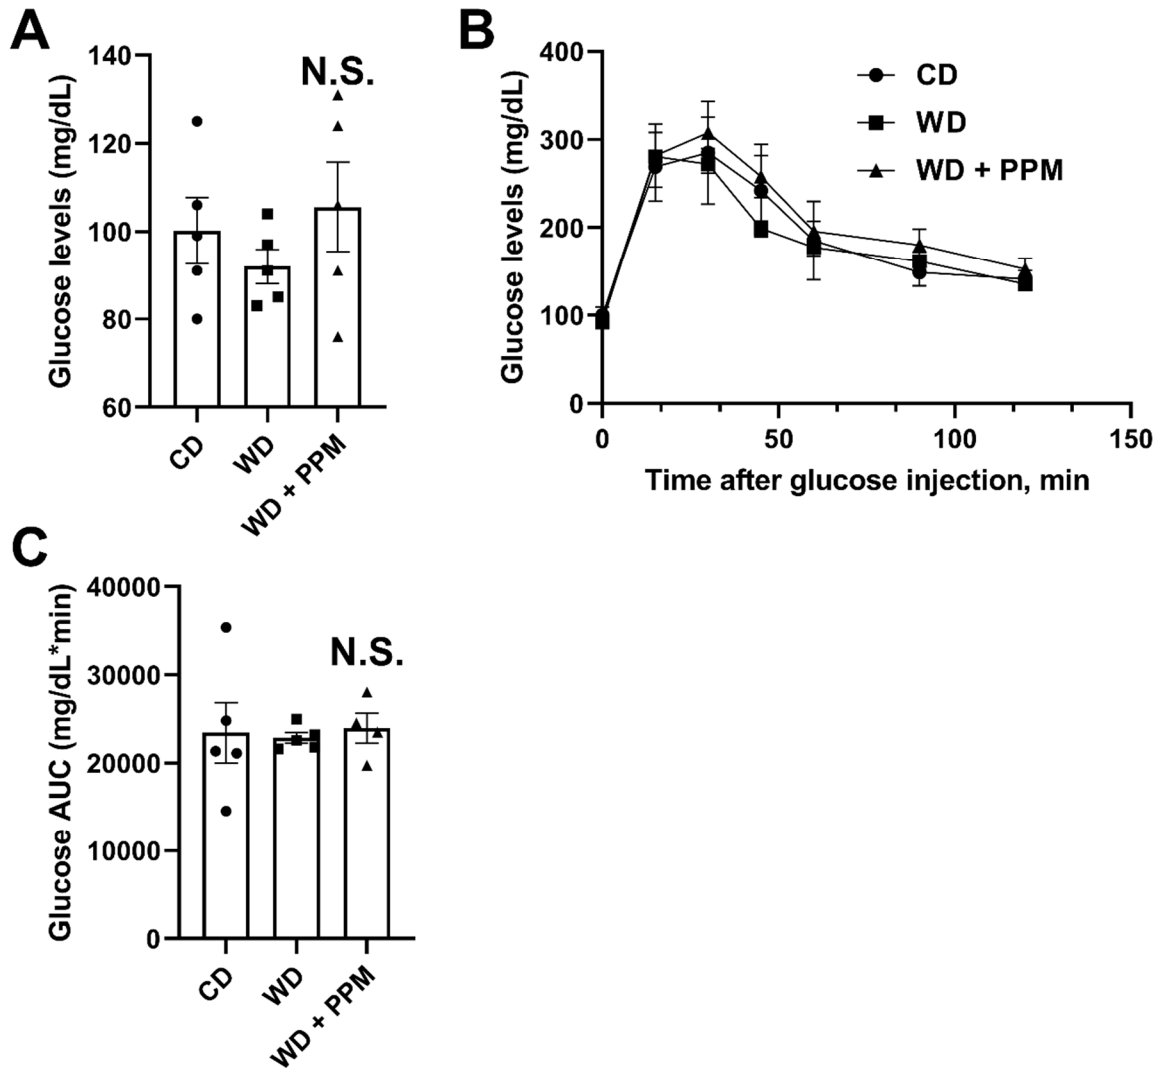

**Figure S1. PPM does not impact fasting glucose levels or response to glucose challenge in female *Ldlr*<sup>-/-</sup> mice.** A. PPM has no effect on fasting glucose levels in female *Ldlr*<sup>-/-</sup> mice. Fasting glucose was measured in female *Ldlr*<sup>-/-</sup> mice on a chow diet or on a western diet with and without PPM treatment for 16 weeks. B-C. Effect of PPM on glucose levels in female *Ldlr*<sup>-/-</sup> mice in response to injection of glucose using IPGTT as described in Methods (n=5 in each group). For each experiment, graph data are expressed as mean  $\pm$  SEM; N.S. by one-way ANOVA with Bonferroni's post hoc test.

Figure S2

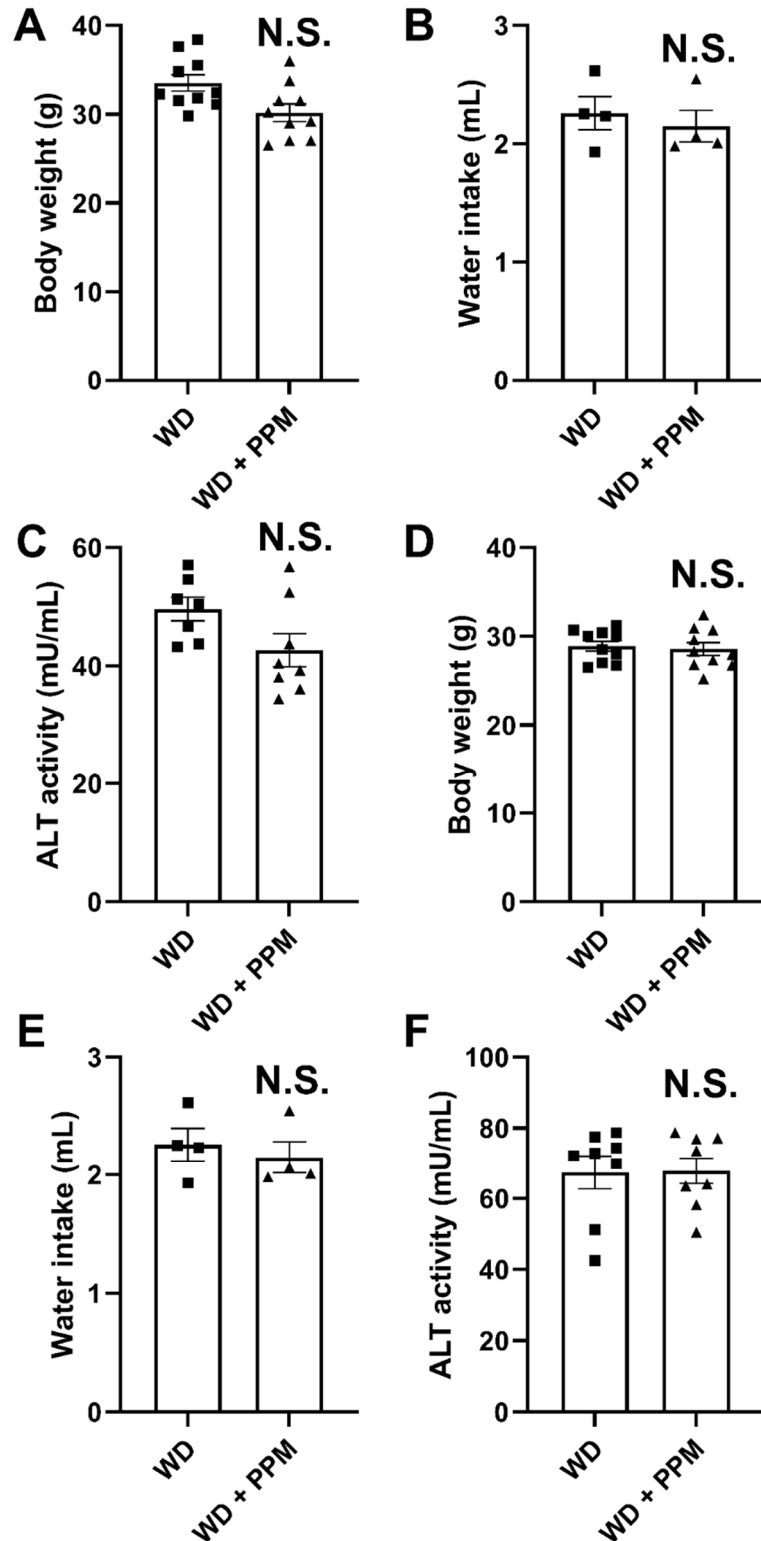

Figure S2. PPM does not affect the body weight, water intake or plasma ALT activities in male or female *Ldlr*<sup>-/-</sup> mice. A-F. The effect of PPM on the body weight, water intake and ALT activities in male (A-C) or female (D-F) *Ldlr*<sup>-/-</sup> mice on a western diet for 16 weeks. For each experiment, graph data are expressed as mean  $\pm$  SEM; \*P <0.05 by one-way ANOVA.

Figure S3

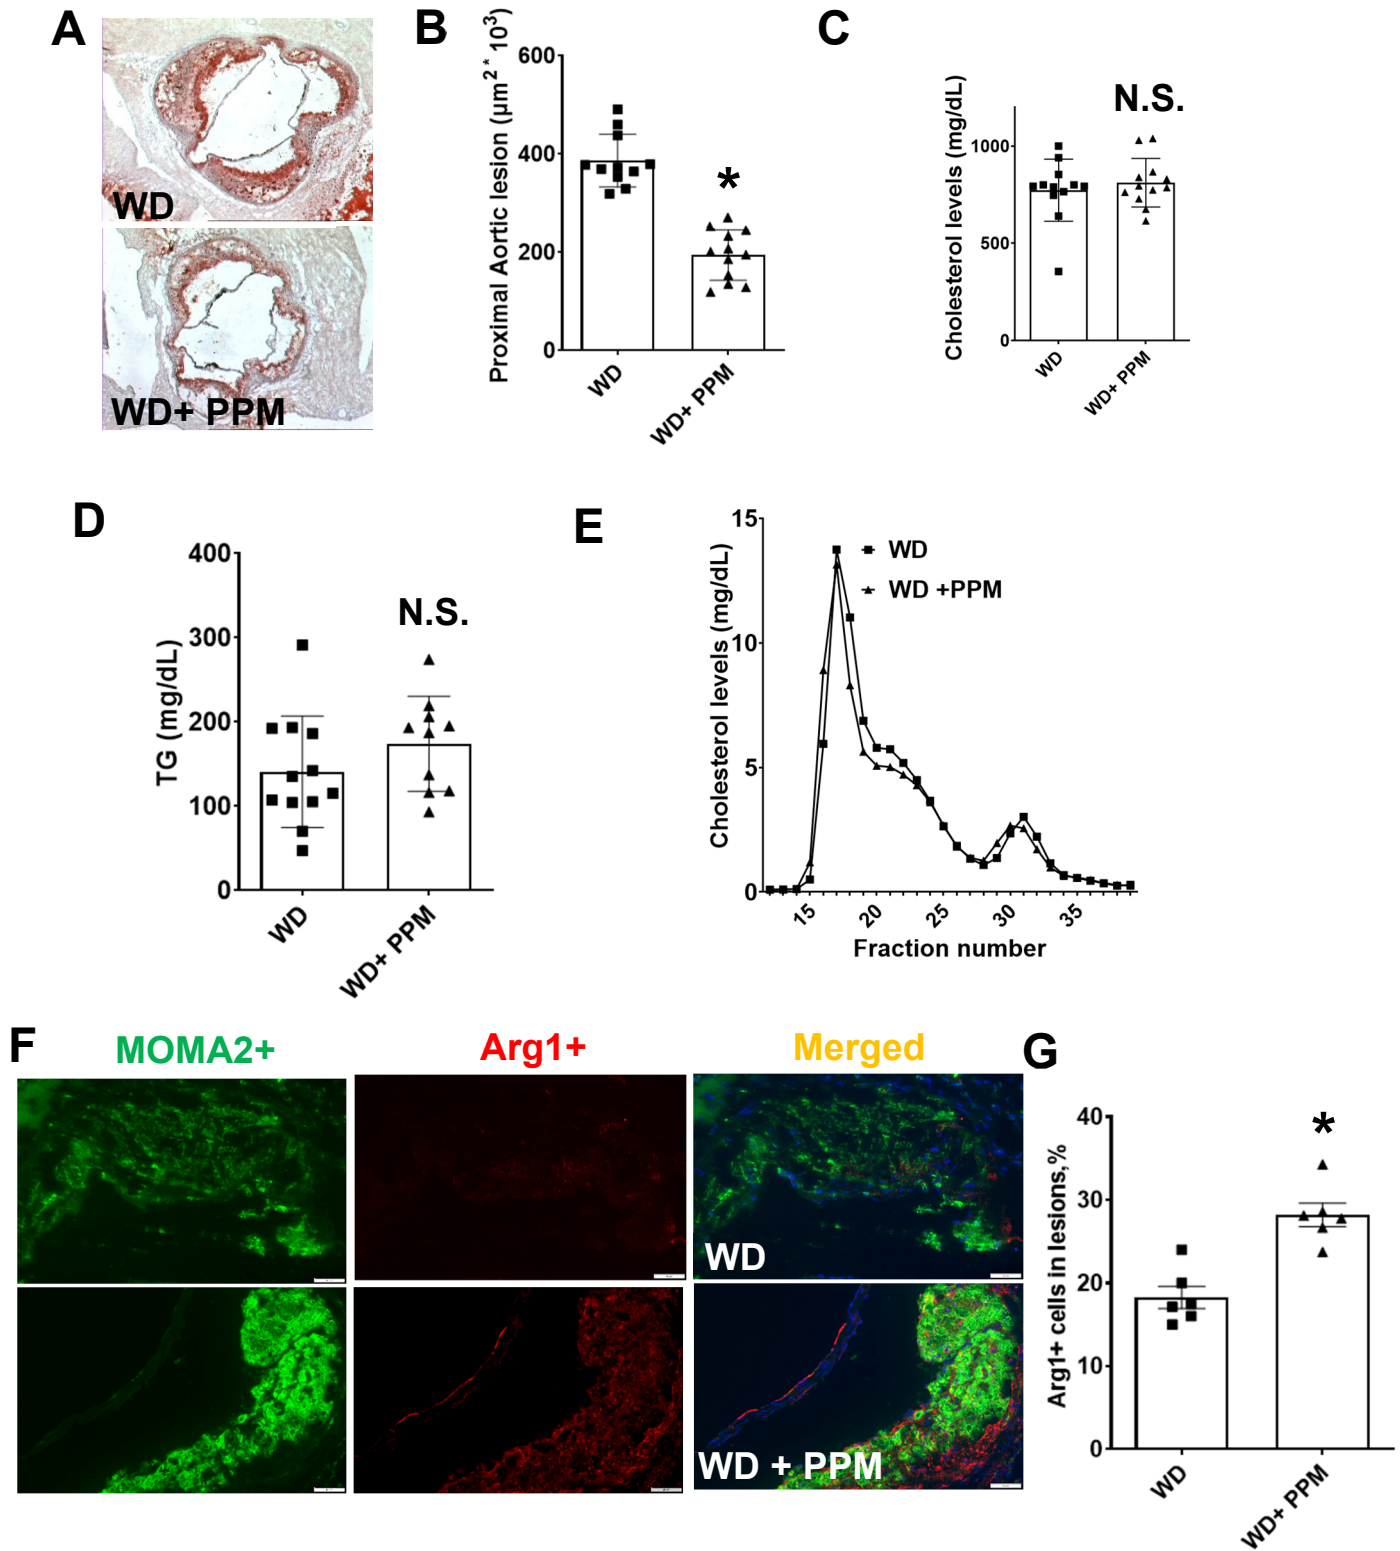

Figure S3. PPM reduces atherosclerotic lesion extent and plaque inflammatory macrophage content in female *Ldlr*<sup>-/-</sup> mice. A-C. PPM does not affect plasma cholesterol, triglycerides, or FPLC lipoprotein profile in female *Ldlr*<sup>-/-</sup> mice. D&E. PPM reduces the aortic root atherosclerotic lesions in female *Ldlr*<sup>-/-</sup> mice. Female *Ldlr*<sup>-/-</sup> mice were pretreated with vehicle

alone or with 1 g/L of PPM for 2 weeks on chow diet. Then, mice were treated with vehicle or 1 g/L of PPM for 16 weeks on WD. Oil-Red-O staining of atherosclerotic lesions in female *Ldlr*<sup>-/-</sup> mice with vehicle (n=12) or PPM (n=12). Scale bar = 200  $\mu$ m. F&G. Immunohistochemistry staining of Arg1+ macrophages was performed as described in Methods. G. PPM increases the number of Arg1+ macrophages in lesions of *Ldlr*<sup>-/-</sup> mice. F. Scale bar = 40  $\mu$ m. n=6 in each group, for each experiment, graph data are expressed as mean  $\pm$  SEM; \*P <0.05 by two-sided unpaired t-test.

**Figure S4**

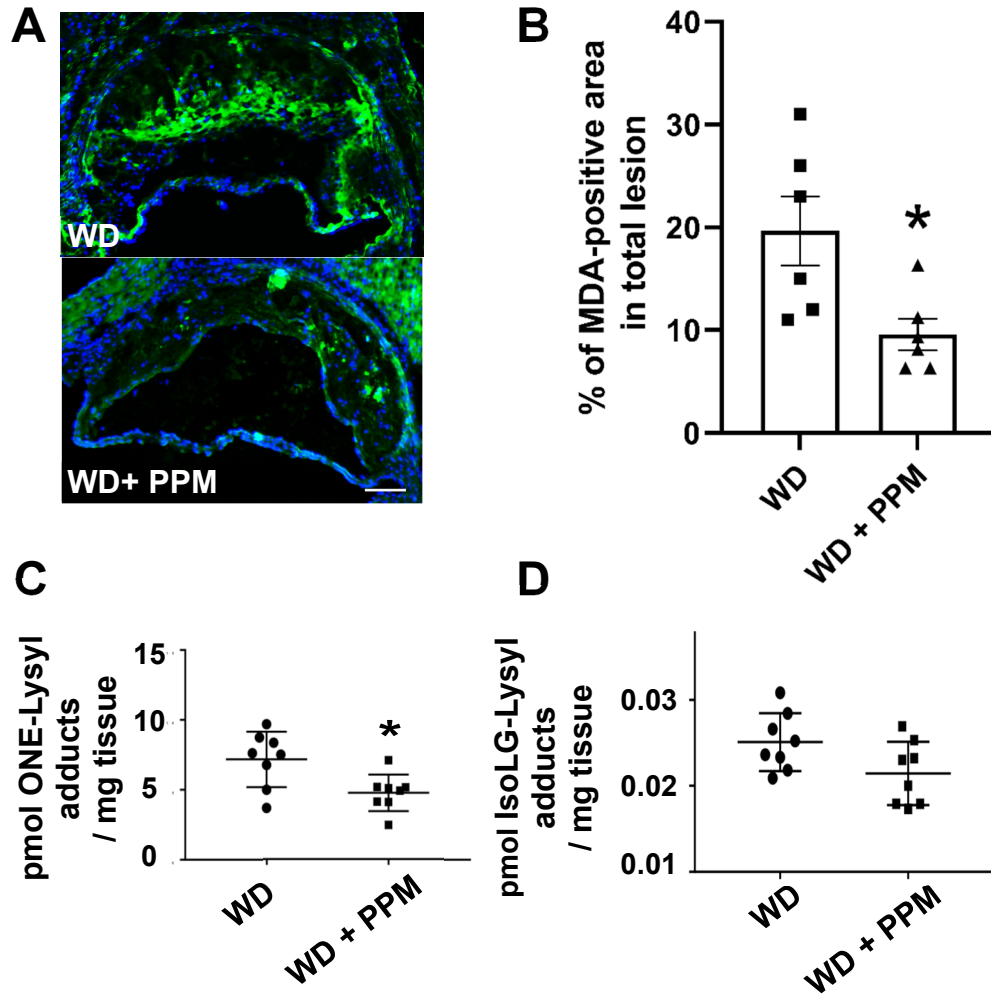

**Figure S4. PPM reduces the lipid reactive dicarbonyl content in lesions of female and male *Ldlr*<sup>-/-</sup> mice.** A-B. PPM reduces MDA-Lysyl adducts in the proximal aortic lesions of female *Ldlr*<sup>-/-</sup> mice. MDA adducts were measured by immunofluorescence using anti-MDA adduct primary antibody (green). Nuclei were counterstained with Hoechst (blue). Representative images (A) and quantitation (B) of MDA adduct /staining in proximal aortic root sections. N = 6 mice per group. Scale bar = 50  $\mu$ m. n=6 in each group, for each experiment, graph data are expressed as mean  $\pm$  SEM; \*P < 0.05 by two-sided unpaired t-test. C. PPM reduces the levels of ONE-Lysyl adducts in the aorta of male *Ldlr*<sup>-/-</sup> mice. Aortic tissues were isolated from male *Ldlr*<sup>-/-</sup> mice and ONE-Lysyl adducts were measured by LC/MS/MS. D. The effect of PPM on the levels of IsoLG-Lysyl adducts in the aorta of *Ldlr*<sup>-/-</sup> mice. Aortic tissues were isolated from the *Ldlr*<sup>-/-</sup> mice and IsoLG-Lysyl adducts were measured by LC/MS/MS. C-D. n=8 in each group, for each experiment, graph data are expressed as mean  $\pm$  SEM; \*P < 0.05 by two-sided unpaired t-test.

Figure S5

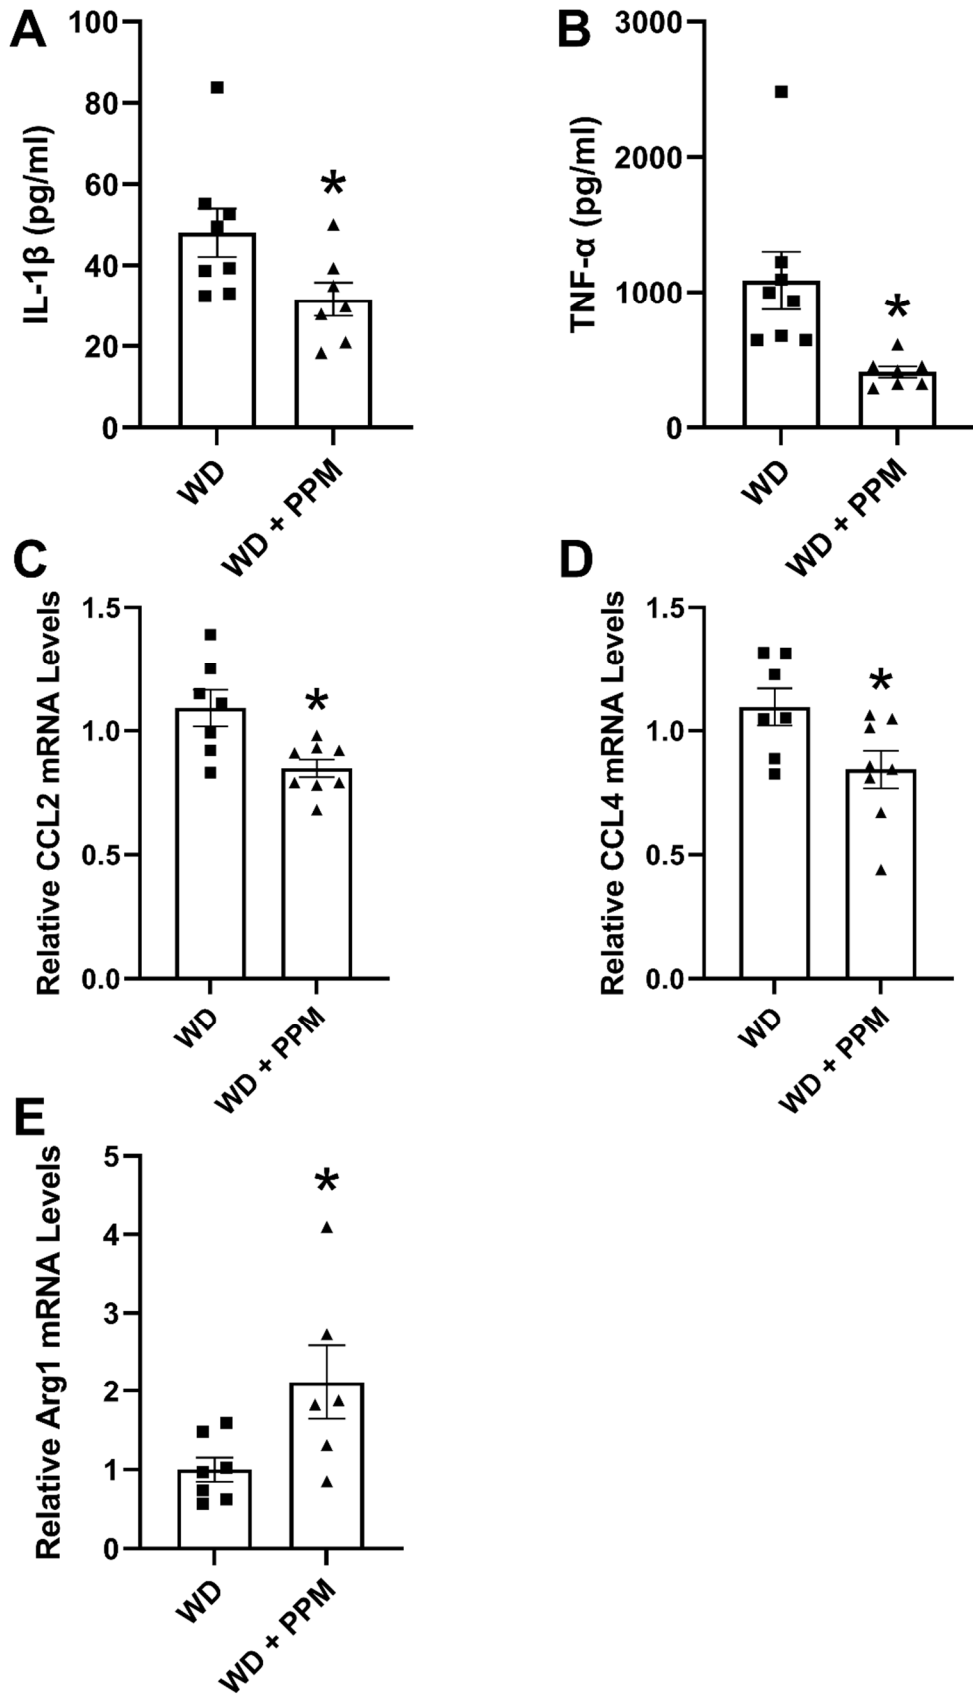

**Figure S5. PPM reduces serum and hepatic inflammatory markers in male *Ldlr*<sup>-/-</sup> mice.** Male *Ldlr*<sup>-/-</sup> mice were treated with 1 g/L of PPM for 16 weeks on WD. A-B. PPM reduces the serum levels of IL-1 $\beta$  and TNF- $\alpha$ , which were measured by ELISA (n=7 per group). C-E. PPM decreases the hepatic expression of inflammatory CCL2 and CCL4 and increases anti-inflammatory Arg1 mRNA levels (n=6, 7, or 8 per group). The mRNA levels were measured by real-time PCR as described in Methods. Data are expressed as mean  $\pm$  SEM; \*P <0.05 by two-sided unpaired t-test.



Figure S6

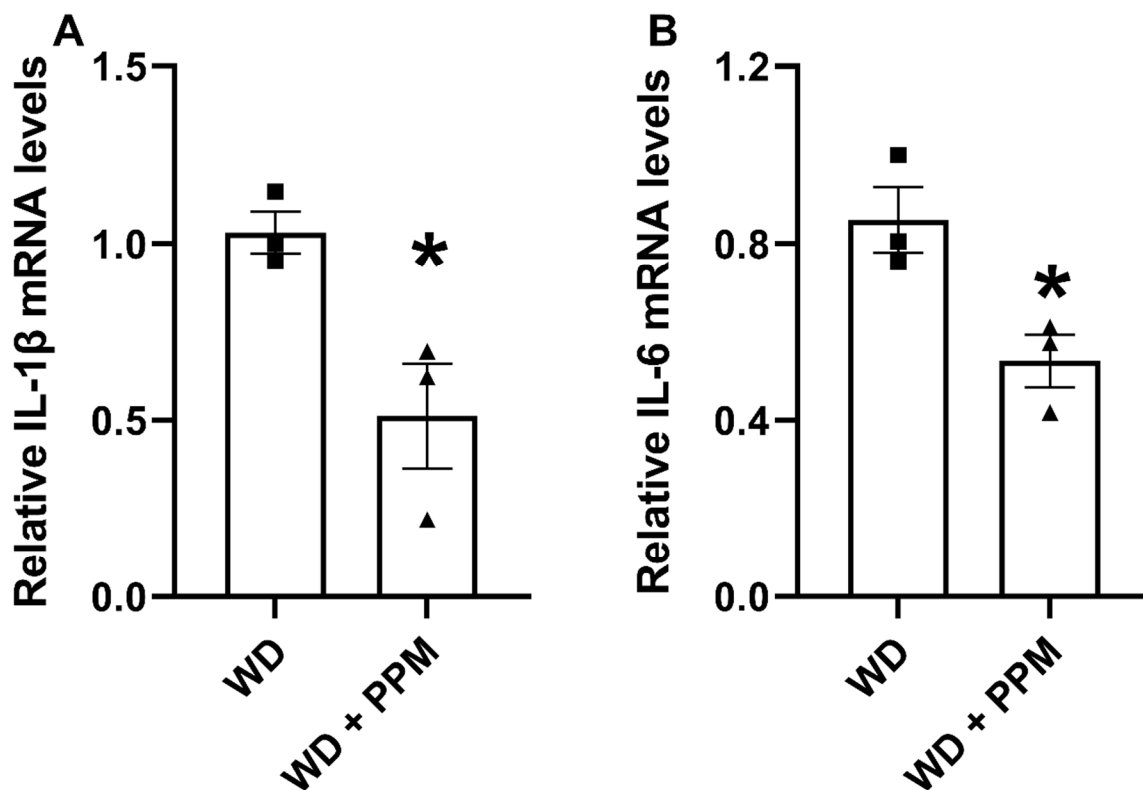

Figure S6. PPM reduces the expression of IL-1 $\beta$  and IL-6 in lesions of male *Ldlr*<sup>-/-</sup> mice. A-B. PPM decreases the mRNA levels of IL-1 $\beta$  and IL-6 in plaques of male *Ldlr*<sup>-/-</sup> mice. Aortic tissues were isolated from male *Ldlr*<sup>-/-</sup> mice that had been fed a western diet for 16 weeks, and the mRNA levels of IL-1 $\beta$  (A) and IL-6 (B) were measured by real-time PCR as described in Methods. n=3 per group. Data are expressed as mean  $\pm$  SEM; \*P <0.05 by two-sided unpaired t-test.

Figure S7

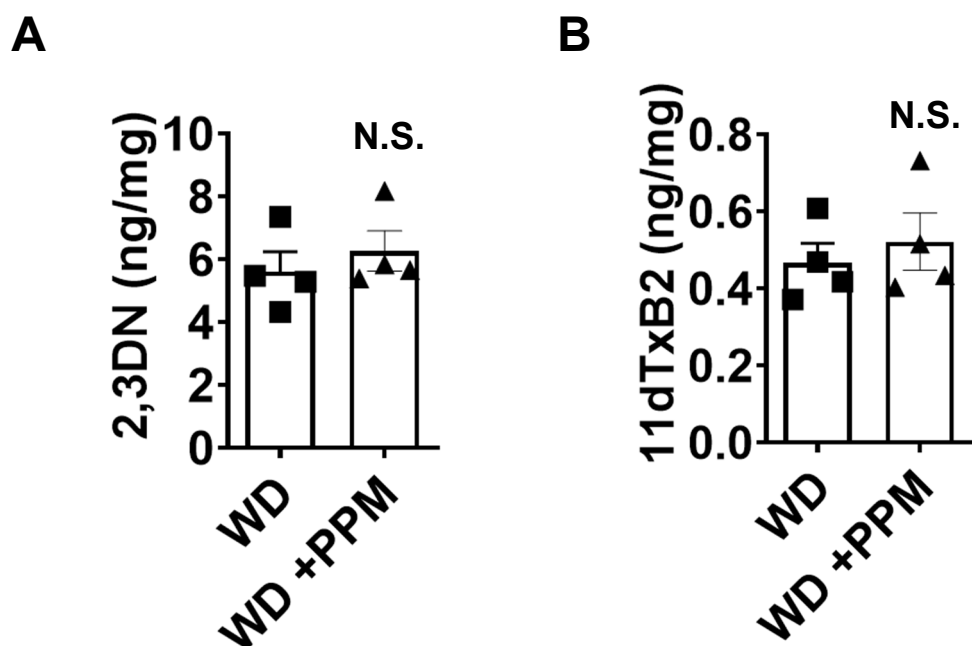

**Figure S7. PPM does not change the levels of PG metabolites in *Ldlr*<sup>-/-</sup> mice.** A-B. Male *Ldlr*<sup>-/-</sup> mice were given vehicle (n=8) or 1 mg/mL PPM (n=8) for 8 weeks. Urine was collected for 6 h in metabolic cages with 2 mice per cage after 8 weeks of treatment with PPM and analyzed by GC/MS for 2,3-dinor-6-ketoPGF1 (2,3DN) and 11-dehydro TxB2 (11dTxB2) by the Eicosanoid Analysis Core at Vanderbilt University. The creatinine levels are measured using a kit (Enzo Life Sciences). The urinary metabolite levels in each sample were normalized using the urinary creatinine level of the sample and expressed as ng/mg creatinine. PPM does not change the levels of 2,3DN or TxB2 in *Ldlr*<sup>-/-</sup> mice (n=4 in each group). Graph data are expressed as mean ± SEM, there is no significant difference between groups determined by using two-sided unpaired t-test.

Figure S8

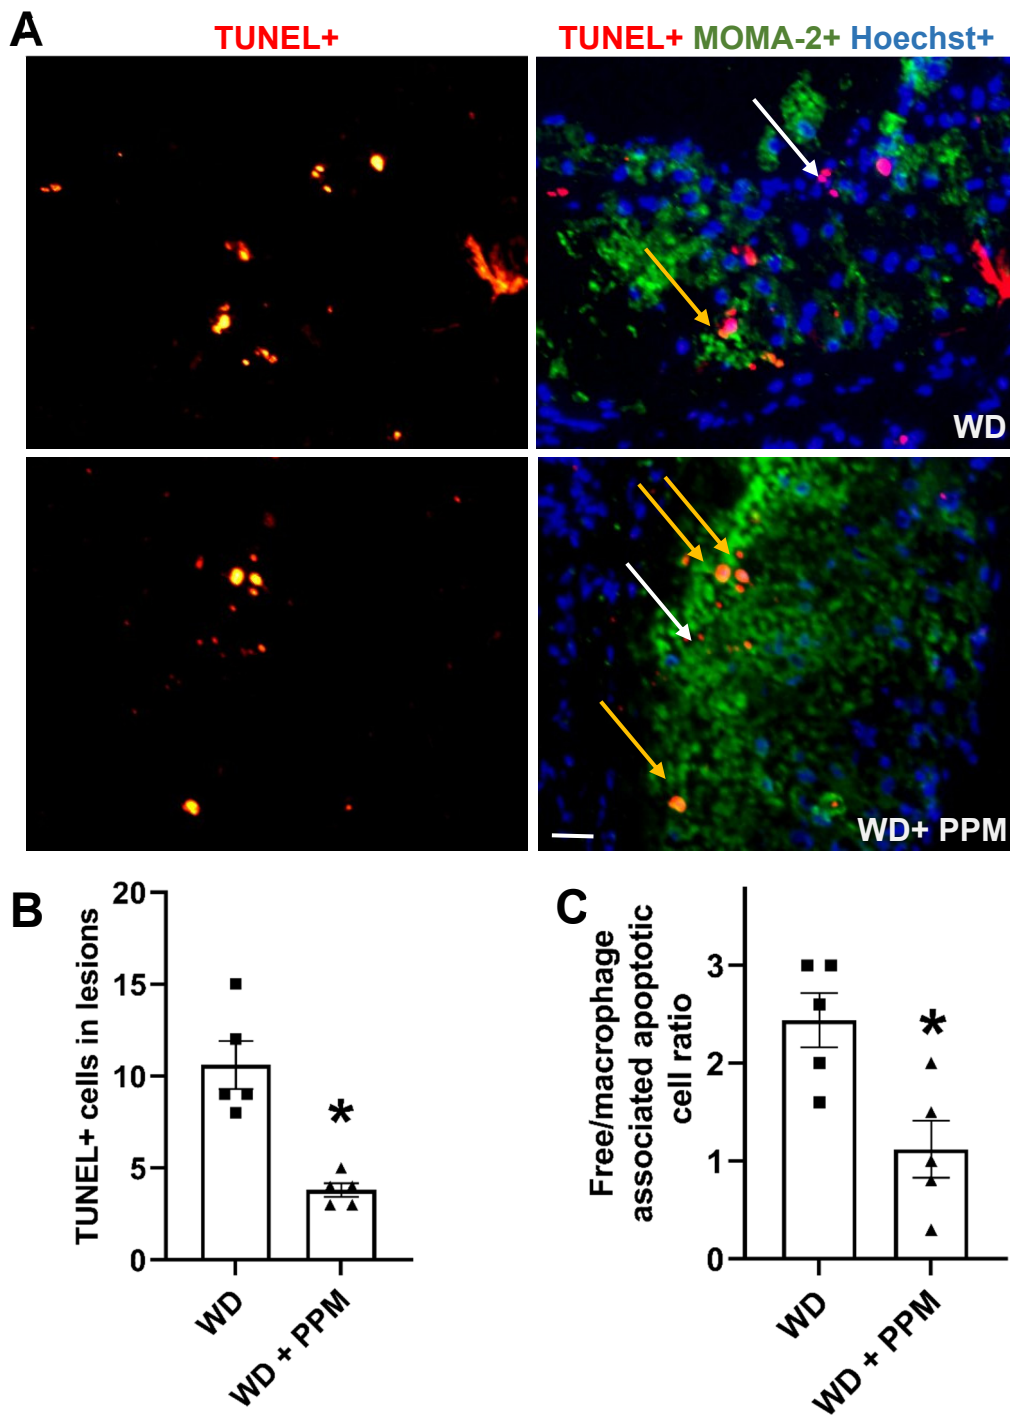

Figure S8. PPM reduces the number of apoptotic cells and increases efferocytosis in atherosclerotic plaques of female *Ldlr*<sup>-/-</sup> mice. A. Images depict TUNEL staining of nuclei (red) and merged images show TUNEL+, MOMA2+ (green) and Hoechst+ (blue) staining of atherosclerotic lesions in male *Ldlr*<sup>-/-</sup> mice. Yellow arrows show macrophage-associated TUNEL

stain and white arrows depict free dead cells that were not associated with macrophages. Scale bar = 50  $\mu\text{m}$ . B. Quantitation of the number of apoptotic cells. C. Efferocytosis was quantitated as the free vs macrophage-associated TUNEL-positive cells in the proximal aortic sections. B-C. n=6 per group. Graph data are expressed as mean  $\pm$  SEM; \*P <0.05 by two-sided unpaired T-test.

## Figure S9

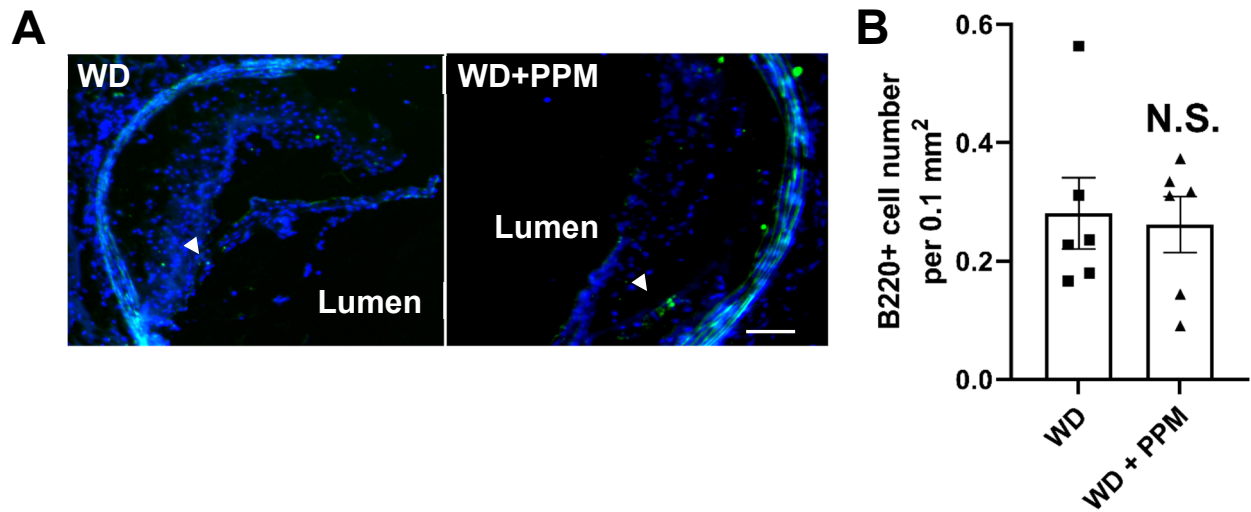

**Figure S9. PPM does not impact the number of B lymphocytes in plaques of female *Ldlr*<sup>-/-</sup> mice.** A-B. Immunohistochemistry staining and quantitation of B220+ (green) B lymphocytes in atherosclerotic lesions of female *Ldlr*<sup>-/-</sup> mice. Scale bar = 50  $\mu$ m. n=6 or 7 per group. Graph data are expressed as mean  $\pm$  SEM; N.S. by two-sided unpaired t-test.

Figure S10

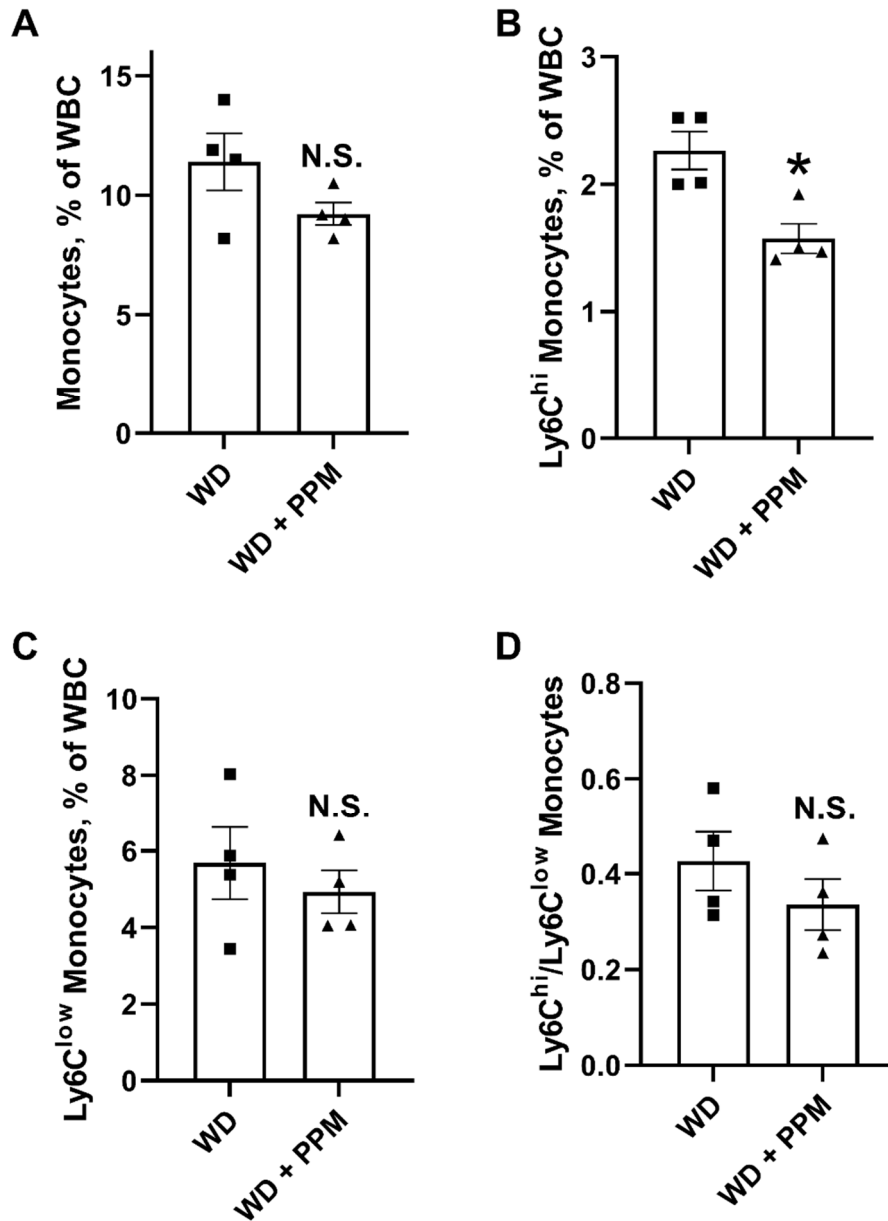

**Figure S10. PPM decreases the number of Ly6C<sup>hi</sup> monocytes in male *Ldlr*<sup>-/-</sup> mice.** A-D. Male *Ldlr*<sup>-/-</sup> mice were fed a western diet for 16 weeks and treated with water alone or with PPM. A. There was a trend toward a reduction in total blood monocytes in PPM versus water treated *Ldlr*<sup>-/-</sup> mice. B. PPM reduced the number of Ly6C<sup>hi</sup> monocytes C. PPM did not impact the number of Ly6C<sup>low</sup> monocytes. F. There was a trend toward a reduction in the ratio of Ly6C<sup>hi</sup> to Ly6C<sup>low</sup> monocytes in PPM versus water treated *Ldlr*<sup>-/-</sup> mice. n=8 in each group. Graph data are expressed as mean  $\pm$  SEM; \*P < 0.05, N.S. by two-sided unpaired t-test.

Figure S11

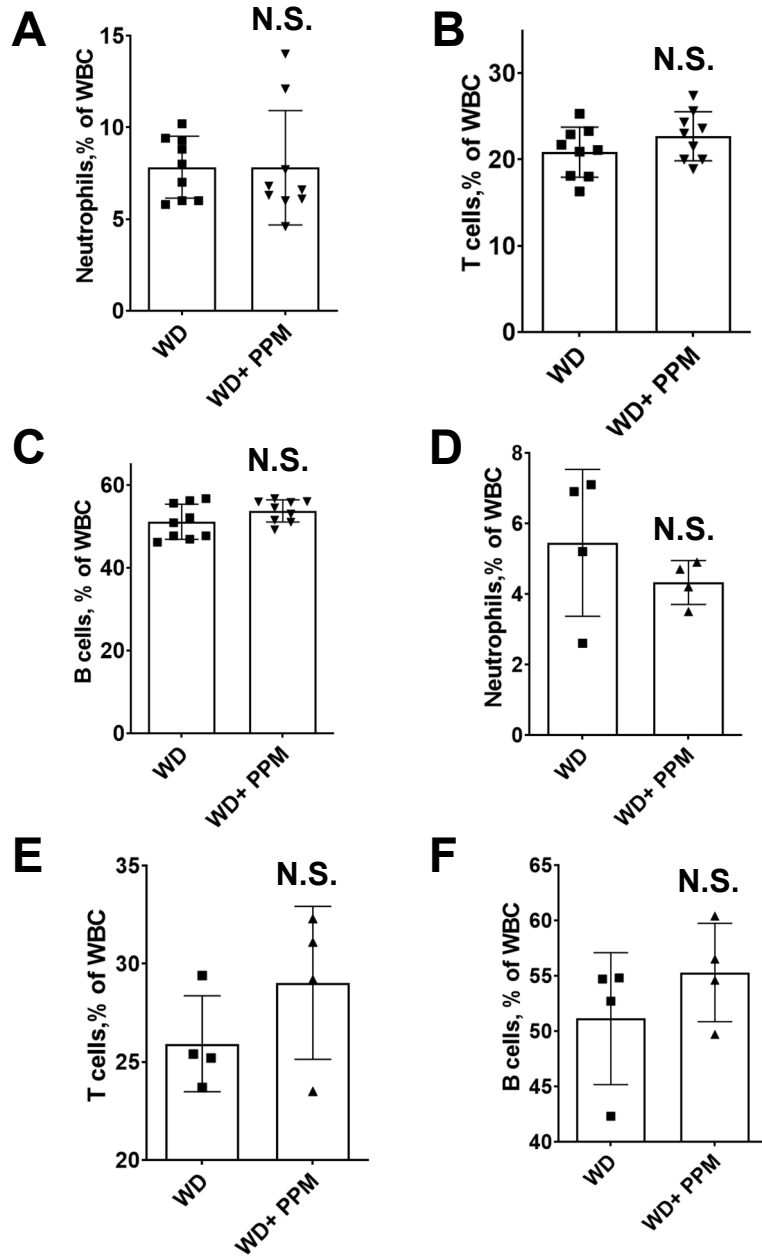

**Figure S11. PPM does not change the number of blood neutrophils, T cells, and B cells in female or male *Ldlr*<sup>-/-</sup> mice.** Female (A-C) or male (D-F) *Ldlr*<sup>-/-</sup> mice were treated with PPM or water alone and fed a western diet for 14 (A-C) or 16 (D-F) weeks. The number of blood neutrophils (A&D), T cells (B&E), and B cells (C&F) were then measured by flow cytometry as described in Methods. n=9 (A-C) or 8 (D-F) per group. Data are expressed as mean  $\pm$  SEM, there is no significant difference between groups determined by using two-sided unpaired t-test.

**Figure S12**

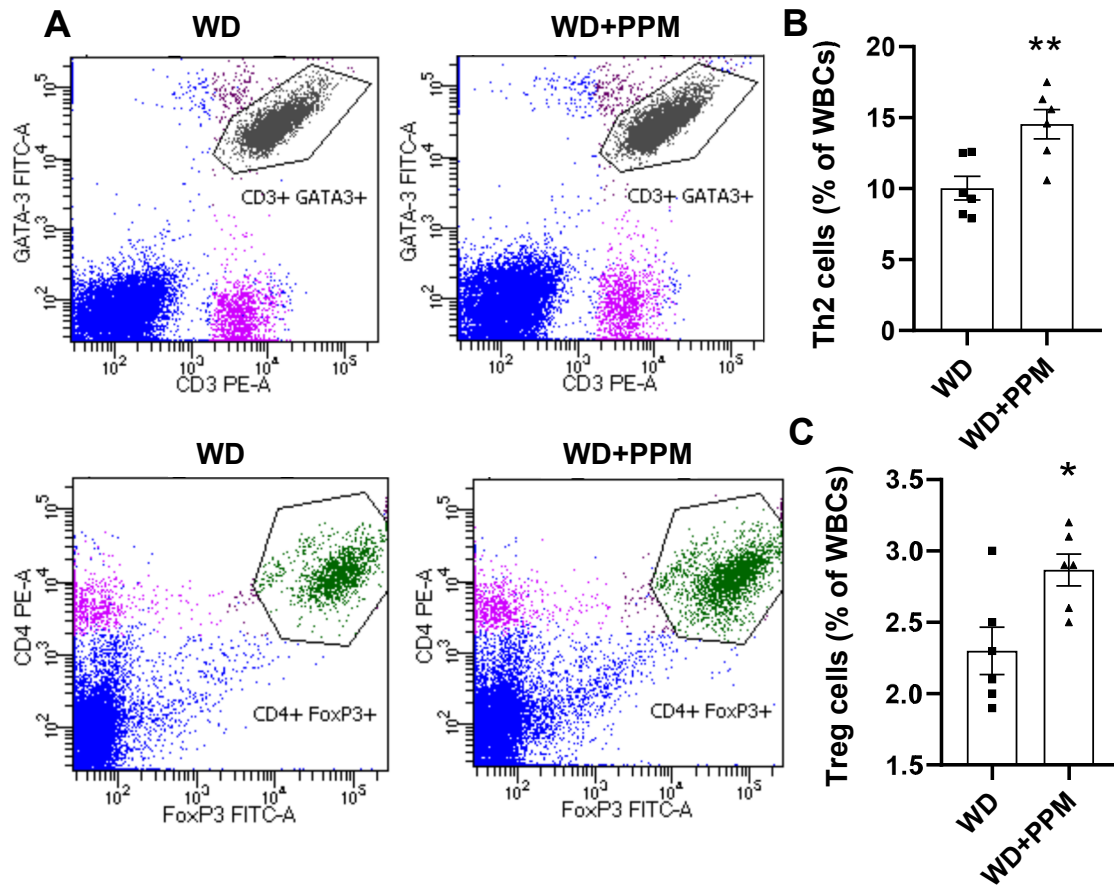

**Figure S12. PPM increases the number of blood Th2 and Treg cells in female *Ldlr*<sup>-/-</sup> mice.**

A-B. The representative flow cytometry gating strategies for Th2 (A) and Treg (B) cells in peripheral blood of vehicle alone or PPM treated female *Ldlr*<sup>-/-</sup> mice fed a western diet for 14 weeks are shown. C. There was an increase in the number of blood Th2 cells (CD3<sup>+</sup>CD4<sup>+</sup>GATA-3<sup>+</sup>CD8<sup>-</sup>) in PPM versus water treated *Ldlr*<sup>-/-</sup> mice. D. PPM treatment increased the number of blood Treg cells (CD3<sup>+</sup>CD4<sup>+</sup> FoxP3<sup>+</sup>). C-D. n=6 in each group. Graph data are expressed as mean  $\pm$  SEM; \*P < 0.05, \*\* P < 0.01 by two-sided unpaired t-test.



Figure S13

A

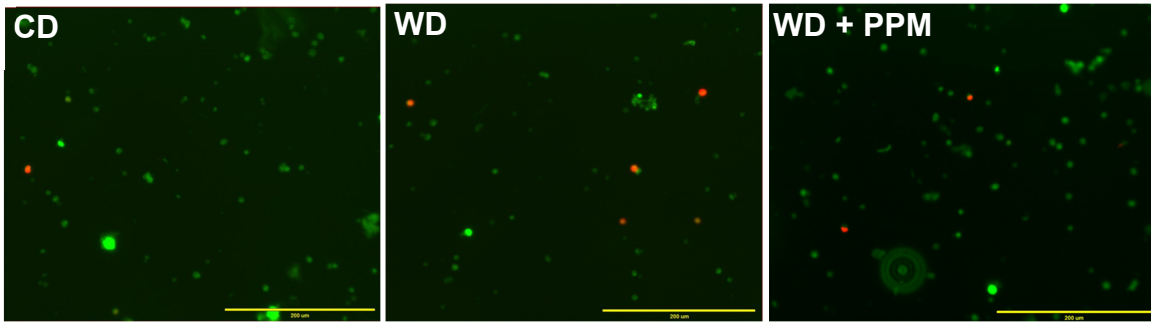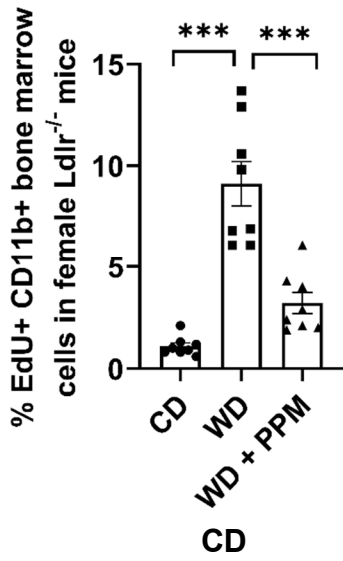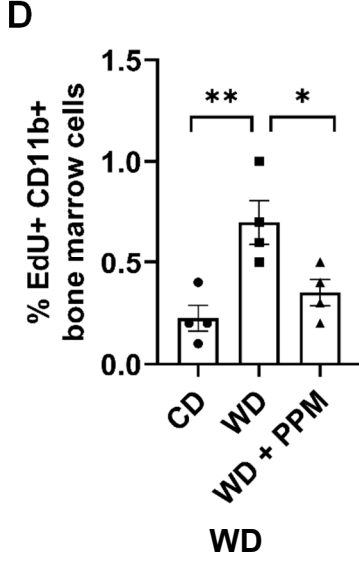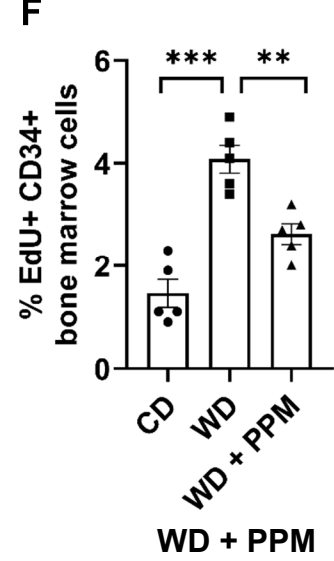

C

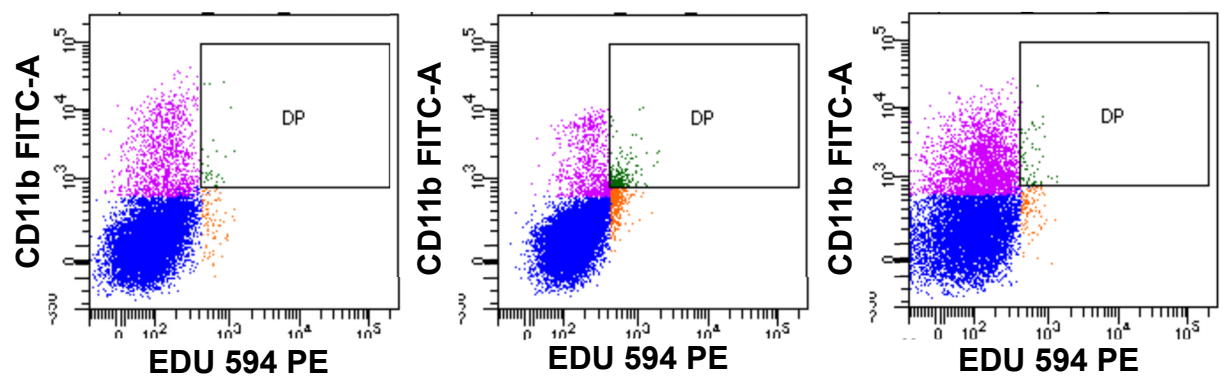

E

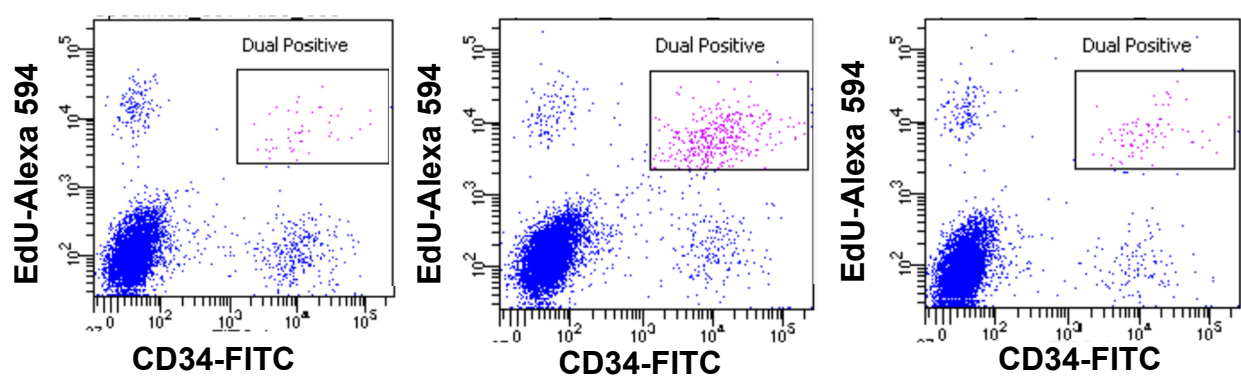

**Figure S13. PPM decreases the proliferation of bone marrow monocytes and HSPC from female *Ldlr*<sup>-/-</sup> mice.** A-F. Bone marrow was isolated from female *Ldlr*<sup>-/-</sup> mice fed a chow or western diet for 16 weeks and treated with water alone or with PPM. A-D. Bone marrow cells were incubated for 24h with 5  $\mu$ M EdU, and then stained with FITC-labeled CD11b antibody (green). EdU (red) was detected as described in the Methods. A-B. Dual EdU<sup>+</sup> CD11b<sup>+</sup> cells were detected by fluorescence microscopy (A) and quantitated (B). n=8 per group. Bar = 200  $\mu$ M. Data are expressed as mean  $\pm$  SEM; \*\*\*\* P<0.0001 by one-way ANOVA with Bonferroni's post hoc test. C-D. Dual EdU<sup>+</sup> CD11b<sup>+</sup> cells were measured by flow cytometry. n=4 per group. Data are expressed as mean  $\pm$  SEM; \*P <0.05, \*\* P<0.01 by one-way ANOVA with Bonferroni's post hoc test. E-F. Dual EdU<sup>+</sup>CD34<sup>+</sup> cells were detected and quantitated by flow cytometry. n=4 each group, Data are expressed as mean  $\pm$  SEM, \*P <0.05, \*\* P<0.01 by one-way ANOVA with Bonferroni's post hoc test.
